# Supplementary material for: Incidence and risk factors of C. trachomatis and N. gonorrhoeae among young women from the Western Cape, South Africa: The EVRI study
Source: PubMed Central journal article supplement (PMC8092667; doi:10.1371/journal.pone.0250871), 2021-05-03
Supplement: pone.0250871.s006.pdf [file pone.0250871.s006.pdf]

**Imibuzo yoku-1-4 kufuneka izaliswe ngumququzeleli wesi sifundo:**

1. Umhla wodliwano-ndlebe (umhla/inyanga/unyaka): |\_\_|\_\_| / \_\_\_\_\_ /  
|\_\_|\_\_|\_\_|

2. I-PID #: | 7\_|\_0\_|\_ \_|\_ \_|\_ |

3. Umhla wokuzalwa (umhla/inyanga/unyaka): |\_\_|\_\_| / \_\_\_\_\_ /  
|\_\_|\_\_|\_\_|

4. Oonobumba bokuqala begama lalowo uthatha inxaxheba kwisifundo: \_\_\_\_\_

\*\*\*\*\*

**UTYELELO LWESI-4  
IPHEPHA ELINEMIBUZO YESIFUNDO  
ISIFUNDO SE-EVRI**

Siyakuvuyela ukuba nomdla kwakho ukuthatha inxaxheba kule projekthi.

Zonke iinkcukacha osinika zona ziza kuba yimfihlelo, kwaye igama lakho alizi kunxulunyaniswa neli phepha lemibuzo kwaye soze lisetyenziswe kwiingxelo.

**Nceda usinike impendulo elungelelana nemeko yakho.**

5) Sithini isimo sakho somtshato? (Nceda uphawule ibhokisi ibenye)

Awutshatanga, zange utshate

Utshatile

Nihlala kunye

Niqhawule umtshato/nahlukene

Ngumhlokokazi

6) Uphele kubani esikolweni? (Nceda uphawule ibhokisi ibenye)

Zange ndiye esikolweni

Khange ndiligqibe ibanga lesi-5

- Ngoku ndingumfundi okwibakala loku-1-7
- Ndisishiye isikolo phambi kokuba ndigqibe ibakala lesi-7
- Ngoku ndingumfundi okwibakala lesi-8-12
- Ndisiyekile isikolo kwaye khange ndiliphumelele ibakala le-12
- Ndilipasile ibanga leshumi/ibakala le-12 kodwa khange ndiye ekholejini/eteknikhoni/eyunivesithi
- Ndiyile ngaphambili ekholejini/eteknikhoni/eyunivesithi
- Ngoku ndingumfundi wasekholejini/eteknikhoni/eyunivesithi
- Ndifumene isidanga/idiploma ekholejini/eteknikhoni/eyunivesithi

7) Ubukhe wasela ubuncinane isiselo esinye (sebhiya, sewayini, okanye esinye isiselo esinxilisayo) kwinyanga enye edlulileyo?

- Ewe
- Hayi (Yiya kumbuzo we-13)

8) Kwinyanga e-1 edlulileyo, zingaphi iintsuku obukhe wasela ngazo ubuncinane isiselo esinye esinxilisayo? (Nceda uphawule ibhokisi ibenye)

- Usuku olunye
- Phakathi kweentsuku ezi-2-5
- Ngaphezu kweentsuku ezi-5

9) Kwiintsuku osela ngazo, ubusela malunga nomlinganiselo weebhotile ezingaphi zebhiya? (Faka u-0 ukuba akukho nanye)

10) Kwiintsuku osela ngazo, ubusela malunga nomlinganiselo weeglasi zewayini ezingaphi? (Faka u-0 ukuba akukho nanye)

11) Kwiintsuku osela ngazo, ubusela malunga nomlinganiselo wemixube yewayini engaphi? (Faka u-0 ukuba akukho nanye)

12) Kwiintsuku osela ngazo, ubusela malunga nomlinganiselo weethothi ezingaphi zotywala? (Faka u-0 ukuba akukho nanye)

13) Uyayitshaya na ngoku isigarethi/imirolo?

Ewe

Hayi (Yiya kumbuzo we-15)

14) Zingaphi iisigarethi/imirolo oyitshayayo ngosuku?

Inani leesigarethi/imirolo

15) Ingaba ngoku usebenzisa icuba elihlafunwayo okanye isinifu? (Nceda uphawule ibhokisi enye kuphela)

Yonke imihla

Ngezinye iintsuku

Zange

**Eli candelo lilandelayo liza kukubuzza imibuzo emalunga nempilo kwiimeko zakho zokuzala**

17) Ingaba ngoku usebenzisa izinto zokucwangcisa inzala (ukuthintela inzala)?

Ewe

Hayi (Yiya kumbuzo wama-20)

18) Loluphi uhlobo lokuthintela ukuzala olusebenzisayo **ngoku**? (*Jonga konke okusebenzayo kuwe*)

Izinto ezityiwayo zokucwangcisa (“iipilisi”)

Isivalo

I-IUD/iluphu/Isixhobo esifakwa esibelekweni sokuthintela ukuzala

Ikhondom

Ugwebu, ikhrimu, ijeli, iyeza elifakwa ebufazini elinyibilikayo

I-Depo okanye ezinye izinto zokucwangcisa ezifana neenaliti

Indlela yokuzibalela ukuba uya nini na exesheni

Ukuyikhupha

Ukuvala (ukubotshwa kweetyhubhu)

Ukuvalwa kwenzala ebudodeni (ukuvala komlingane wakhe inzala umphelo)

Olunye

**Imibuzo elandelayo esiza kukubuza yona ivakala buthathaka. Nceda uqaphele ukuba eminye imibuzo ibhekisele kwixesha PHAMBI kokuba uqale kwesi sifundo, eminye imibuzo ibhekisele kwixesha EMVA kokuba uqale kwesi sifundo.**

20) Ukususela oko kuqalwe esi sifundo wakhe wanalo iqabane owabelana nalo ngesondo apho wawusazi okanye ulicingela ukuba linesifo esosulela ngokwabelana ngesondo (iSTD), okanye apho uye wafumanisa mva ukuba ebenesifo esosulela ngokwabelana ngesondo (iSTD)?

Ewe

Hayi

21) Ukususela oko kuqalwe esi sifundo, wakhe wanalo iqabane owabelana ngesondo elakhe laneNtsholongwane kaGawulayo, okanye apho wafumanisa kamva ukuba lineNtsholongwane kaGawulayo?

Ewe

Hayi

22) Ukususela oko kuqalwe esi sifundo wakhe wanalo iqabane owabelana nalo ngesondo elakhe lanesifo esosulela ngesondo?

Ewe

Hayi

Andazi

23) Ukususela oko kuqalwe esi sifundo wakhe wanalo iqabane eliyindoda owabelana nalo ngesondo elaye loluka?

Ewe

Hayi

Andazi

24) Ingaba iqabane lakho eliyindoda owabelana nalo ngesondo rhoqo lolukile? (Nceda ukhethe ibhokisi enye kuphela)

Ewe

Hayi

Andazi

Andinalo ngoku iqabane eliyindoda endabelana nalo rhoqo ngesondo

**Eli candela lilandelayo liza kukubuza imibuzo ngezinxulumene nezesondo,**

26) Wawunangaphi ukuqala kwakho ukwabelana ngesondo ngokulalana?

Iminyaka ubudala

27) Ebomini bakho, mangaphi amadoda okwakhe wabelana nawo ngesondo ngokulalana?

Amadoda

28) Ukususela oko kuqalwe esi sifundo, mangaphi amadoda ohluka-hlukeneyo owakhe wabelana ngesondo ngokulalana nawo?

Amadoda

29) Ukususela oko kuqalwe esi sifundo, mangaphi amadoda owakhe wabelana ngesondo ngokulalana nawo okokuqala?

Amadoda

30) Phambi kokuba kuqalwe esi sifundo, ngokomlinganiselo mangaphi amadoda owakhe wabelana ngesondo ngokulalana nawo? (Nceda ukhetha impendulo ibenye kuphela)

Ngaphantsi kwakanye ngenyanga

Ngaphezu kwakanye ngenyanga

Ngaphezu kwakanye ngeveki

31) Ukususela oko kuqalwe esi sifundo, ngokomlinganiselo ubusabelana kangaphi ngesondo ngokulalana? (Khetha impendulo ibenye kuphela)

Ngaphantsi kwakanye ngenyanga (Yiya kumbuzo wama-34)

Ngaphezu kwakanye ngenyanga (Yiya kumbuzo wama-33)

Ngaphezu kwakanye ngeveki (Yiya kumbuzo wama-32)

32) Ukususela oko kugalwe esi sifundo, ngokomlinganiselo zingaphi izihlandlo ngeveki okhe wabelana ngesondo ngokulalana?

Izihlandlo ngeveki (Yiya kumbuzo wama-34)

33) Ukususela oko kugalwe esi sifundo, ngokomlinganiselo zingaphi izihlandlo ngenyanga okhe wabelana ngesondo ngokulalana?

Izihlandlo ngenyanga

34) Phambi kokuqalwa kwenzi sifundo, ngoku wawusabelana ngesondo ngokulalana, wena okanye iqabane lakho naniyisebenzisa kangaphi ikhondom? (Nceda uphawule ibhokisi ibenye kuphela)

Soloko

Ngaphezu kwesiqingatha sexesha

Isiqingatha sexesha

Ngaphantsi kwesiqingatha sexesha

Zange

35) Ukususela oko kugalwe, esi sifundo, ngoku wawusabelana ngesondo ngokulalana, wena okanye iqabane lakho nanizisebenzisa kangaphi ikhondom? (Nceda uphawule ibhokisi ibenye kuphela)

Soloko

Ngaphezu kwesiqingatha sexesha

Isiqingatha sexesha

Ngaphantsi kwesiqingatha sexesha

Zange

36) Ingaba wena okanye iqabane lakho nakhe nasebenzisa ikhondom kwixesha elidlulileyo nisabelana ngesondo ngokulalana? (Nceda uphawule ibhokisi ibenye kuphela)

Ewe

Hayi

Andisakhumbuli

Zange ndisebenzise khondom xa ndisabelana ngesondo ngokulalana

37) Phambi kokuqalwa kwesi sifundo, wakhe wabelana ngesondo ngomlomo nendoda?

Ewe

Hayi

38) Ukususela oko kuqalwe esi sifundo, wakhe wabelana ngesondo ngomlomo nendoda?

Ewe

Hayi (Yiya kumbuzo wama-42)

39) Ukususela oko kuqalwe esi sifundo, ngokomlinganiselo wakhe wabelana ngesondo kangaphi ngomlomo nendoda? (Khetha impendulo ibenye kuphela)

Ngaphantsi kwakanye ngenyanga (Yiya kumbuzo wama-42)

Ngaphezu kwakanye ngenyanga (Yiya kumbuzo wama-41)

Ngaphezu kwakanye ngeveki (Yiya kumbuzo wama-40)

40) Ukususela oko kuqalwe esi sifundo, ngokomlinganiselo zingaphi izihlandlo owakhe wabelana ngesondo ngeveki ngomlomo nendoda?

Izihlandlo (Yiya kumbuzo wama-42)

41) Ukususela oko kuqalwe esi sifundo, ngokomlinganiselo zingaphi izihlandlo owakhe wabelana ngesondo ngenyanga ngomlomo nendoda?

Izihlandlo

42) Phambi kokuqalwa kwesi sifundo, ingaba yakhe indoda yabelana ngesondo ngomlomo nawe?

Ewe

Hayi

43) Ukususela oko kuqalwe esi sifundo, ingaba yakhe indoda yabelana ngesondo ngomlomo nawe?

Ewe

Hayi (Yiya kumbuzo wama-47)

44) Ukususela oko kuqalwe esi sifundo, mangaphi amaxesha indoda isabelana ngesondo ngomlomo nawe? (Khetha impendulo ibenye kuphela)

Ngaphantsi kwakanye ngenyanga (Yiya kumbuzo wama-47)

Ngaphezu kwakanye ngenyanga (Yiya kumbuzo wama-46)

Ngaphezu kwakanye ngeveki (Yiya kumbuzo wama-45)

45) Ukususela oko kuqalwe esi sifundo, zingaphi izihlandlo owakhe wabelana ngesondo ngeveki ngomlomo?

Izihlandlo (Yiya kumbuzo wama-47)

46) Ukususela oko kuqalwe esi sifundo, zingaphi izihlandlo owakhe wabelana ngesondo ngenyanga nendoda?

Amaxesha

47) Phambi kokuqalwa kwesi sifundo, wakhe wabelana ngesondo ngemva?

Ewe

Hayi

48) Ukususela oko kuqalwe esi sifundo, wakhe wabelana ngesondo ngemva?

Ewe

Hayi (Yiya kumbuzo wama-54)

49) Ukususela oko kuqalwe esi sifundo, ngokomlinganiselo kukangaphi usabelana ngesondo ngemva?

(Khetha impendulo ibenye kuphela)

Ngaphantsi kwakanye ngenyanga (Yiya kumbuzo wama-52)

Ngaphezu kwakanye ngenyanga (Yiya kumbuzo wama-51)

Ngaphezu kwakanye ngeveki (Yiya kumbuzo wama-50)

50) Ukususela oko kugalwe esi sifundo, ngokomlinganiselo zingaphi izihlandlo ngeveki usabelana ngesondo ngemva?

Amaxesha (Yiya kumbuzo wama-52)

51) Ukususela oko kugalwe esi sifundo, ngokomlinganiselo zingaphi izihlandlo ngenyanga usabelana ngesondo ngemva?

Amaxesha

52) Ukususela oko kugalwe esi sifundo, ngoku nanisabelana ngesondo ngemva, mangaphi amaxesha umlingane wakho wayesebenzisa ngawo iikhondom? (Nceda ukhethe ibhokisi enye kuphela)

Soloko

Ngaphezu kwesiqingatha sexesha

Isiqingatha sexesha

Ngaphantsi kwesiqingatha sexesha

Zange

53) Ingaba iqabane lakho lakhe lasebenzisa iikhondom ukugqibela kwenu ukwabelana ngesondo ngemva? (Nceda uphawule ibhokisi ibenye kuphela)

Ewe

Hayi

Andikhumbuli

54) Ukususela oko kugalwe esi sifundo, ingaba ikhona na indoda eyakhe yakupha izipho, imali okanye iziyobisi kuba ifuna ukulala nawe?

Ewe

Hayi (Yiya kumbuzo wama-58)

55) Ukususela oko kugalwe esi sifundo, mangaphi amaxesha amadoda ekupha izipho, imali okanye iziyobisi benaniselana ngoko kuba befuna ukulala nawe?

Amaxesha

56) Ukususela oko kuqalwe esi sifundo, ngoku ubunikwa izipho, imali, okanye iziyobisi zokuba wabelane nabo ngokulalana, nizisebenzise kangaphi wena okanye umlingane wakho iikhondom? (Nceda uphawule ibhokisi ibenye)

Rhoqo

Ngaphezu kwesiqingatha sexesha

Isiqingatha sexesha

Ngaphantsi kwesiqingatha sexesha

Zange

**Sinomdla ngeengcinga zakho malunga nesi sifundo ukuze sisiphucule. Icandelo elilandelayo libuza imibuzo malunga nokuthatha kwakho inxaxheba kwesi sifundo. Nceda uphendule ngokunyanisekileyo kangangoko unako.**

58) Phambi kokuba uvume ukuthatha inxaxheba kwesi sifundo, ingaba injongo yesifundo wayicaciselwa ngokucacileyo?

Ewe

Hayi

59) Ingaba imali esikunike yona ukuze ukwazi ukukhwela yayanele ukuzithwala ezo ndleko zakho?

Ewe

Hayi

60) Ukulufumana kwakho olu phando kwicwecwe lekhompyutha walifumana icwecwe:

Kulula ukulisebenzisa

Lilungile kodwa lidinga uncedo oluncinane

Linzima, ndidinge uncedo olukhulu

Ndinge uncedo kodwa ndakhetha ukungalufuni olo ncedo

61) Ingaba ukhetha iphepha elinemibuzo kunecwecwe?

Ewe, ndikhetha iphepha

Hayi, ndikhetha icwecwe

62) Ingaba imibuzo yophando ilula ukuba ungayiqonda?

Ewe, yonke bekulula ukuyiqonda

Ewe, uninzi lwayo bekulula ukuyiqonda

Hayi, uninzi lwayo bekunzima ukuyiqonda

63) Loluphi ulwimi lwakho lwasekhaya?

IsiNgesi

IsiBhulu

IsiXhosa

Olunye

64) Loluphi olona lwimi uziva ukhululekile ukuluthetha?

IsiNgesi

IsiBhulu

IsiXhosa

Olunye

65) Loluphi olona lwimi uziva ukhululekile ukulufunda?

IsiNgesi

IsiBhulu

IsiXhosa

Olunye

66) Ingaba ulwenze ngesiXhosa uphando?

Ewe

Hayi (Yiya kumbuzo wama-68)

67) Ingaba isigama sesiXhosa:

- Bekulula ukusiqonda  
 Bekunzima ukusiqonda  
 Ibisigama esingafanelekanga

68) Ingaba ubungaphantsi kweminyaka eli-18 ukuqalwa kwesi sifundo?

- Ewe  
 Hayi (Yiya kumbuzo wama-70)

69) Ukhatshwe ngubani ukuya ekliniki waze wakunika imvume yokuba uthathe inxaxheba?

- Umama  
 Umakhulu  
 Omnye

70) Xa ubutyikitya ifomu yesivumelwano, ikhona imibuzo oye wayibuza?

- Hayi, yonke into ndiyiqondile kwaye khangе ndibe namibuzo  
 Hayi, bendisoyika ukubuza imibuzo  
 Ewe, ndibuze imibuzo

71) Singenza ntoni ukuzenza iimvavanyo zombelekisi zikwenze ukhululekile? (Jonga konke okusebenzayo)

- Bezilunge ngolu hlobo bezilulo  
 Makubekho indawo yabucala  
 Azinamsebenzi, ziza kuhlala zindenza ndingaziva ndikhululekile

72) Ingaba uzive ungakhululekanga xa ubuhlolwa ukuba awunaNtsholongwane kaGawulayo kusini na?

- Ewe  
 Hayi

73) Ingaba ufunde ngakumbi malunga nezzifo ezosulela ngokwabelana ngesondo ngokuthatha kwakho inxaxheba kwesi sifundo?

- Ewe, kakhulu
- Ewe, pha napha
- Hayi

74) Uzitshintshe njani iindlela zokuziphatha ukususela oko uthatha inxaxheba kwesi sifundo? (Jonga konke okusebenzayo)

- Ndizisebenzisa rhoqo iikhondom
- Ndizisebenzisa ngalo lonke ixesha ndisabelana ngesondo iikhondom
- Ndiyathetha nosapho lwam okanye nezihlobo zam malunga nezifo ezosulela ngokwabelana ngesondo
- Ndiyathetha neqabane lam endabelana ngalo ngesondo malunga nezifo ezosulela ngokwabelana ngesondo
- Andizitshintshanga iindlela zam zokuziphatha

75) Ingaba ungakucinga ukuthatha inxaxheba kwesinye isifundo esifana nesi kwixesha elizayo?

- Ewe
- Hayi

76) Ingaba unqwenela ukuziva iziphumo zesi sifundo?

- Ewe
- Hayi

**SIYABULELA NGEXESHA LAKHO.  
IGALELO LAKHO LIBALULEKE KAKHULU KWISIFUNDO SETHU.  
UYASINCEDA UKUZE SIKWAZI UKUCWANGCISA NGCONO NGOKUKHATHALELWA  
KWEMPILO EKUHLALENI.**
